# Supplementary material for: The role of TRIF protein in regulating the proliferation and antigen presentation ability of myeloid dendritic cells through the ERK1/2 signaling pathway in chronic low-grade inflammation of intestinal mucosa mediated by flagellin-TLR5 complex signal
Source: PeerJ journal article supplement (doi:10.7717/peerj.16716), 2024-01-02
Supplement: uncroppedWBGels.pdf [file uncroppedWBGels.pdf]

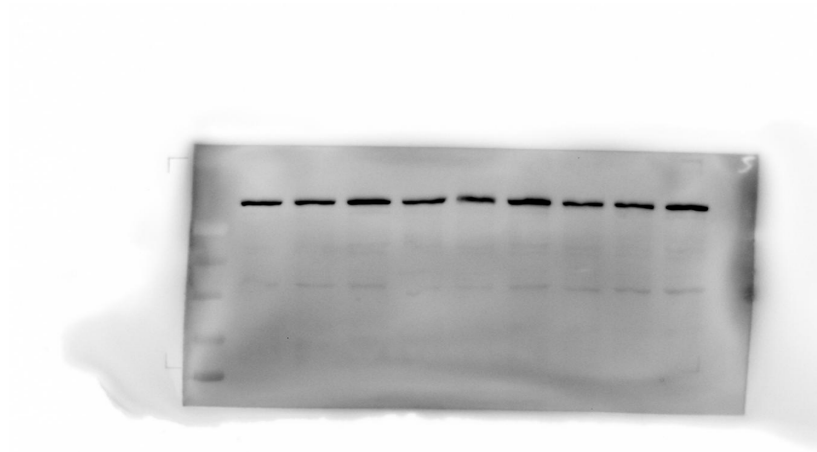

**TLR5**

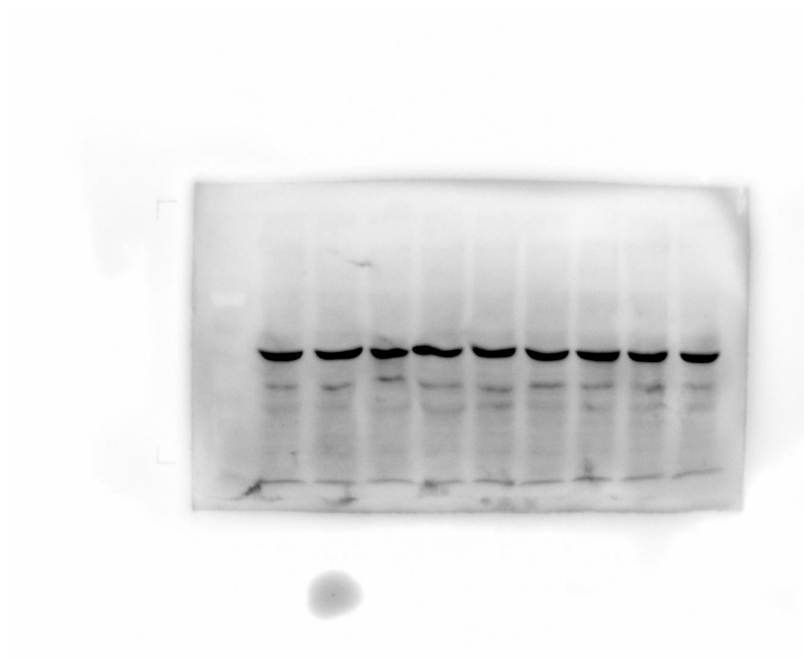

***β-actin***

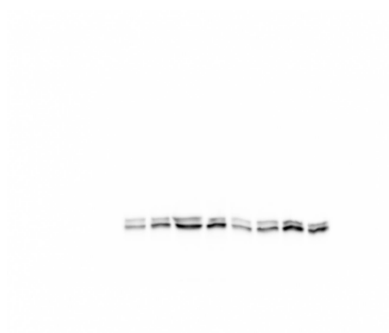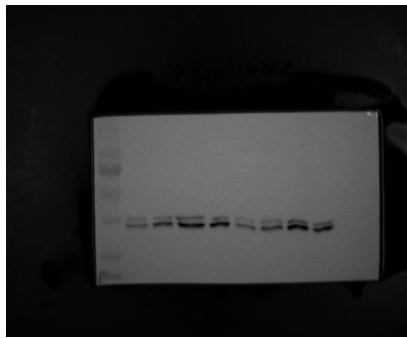

**pERK1/2**

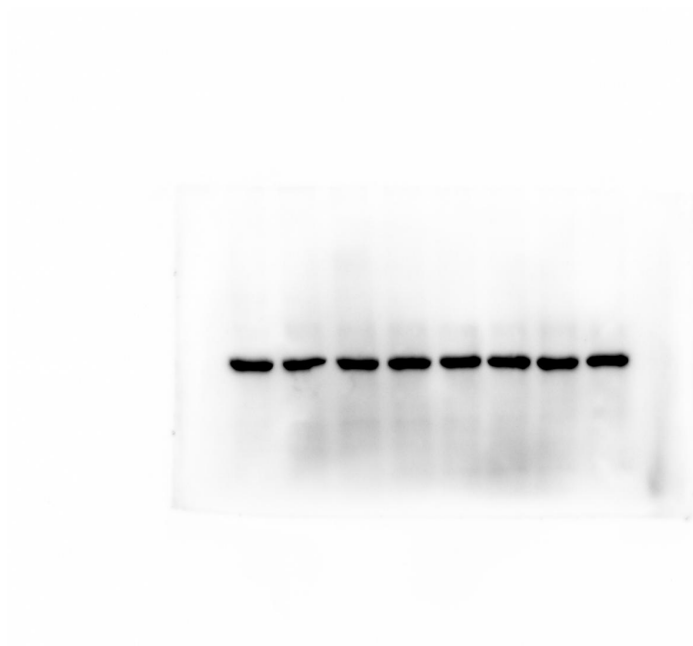

***β-actin***

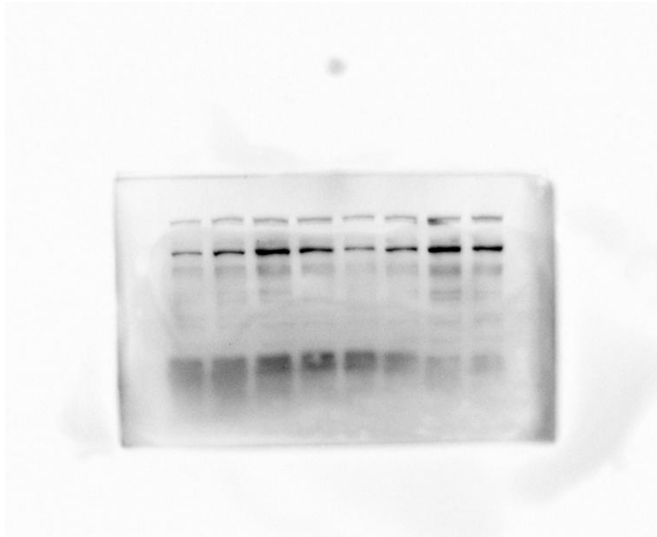

*TRIF*

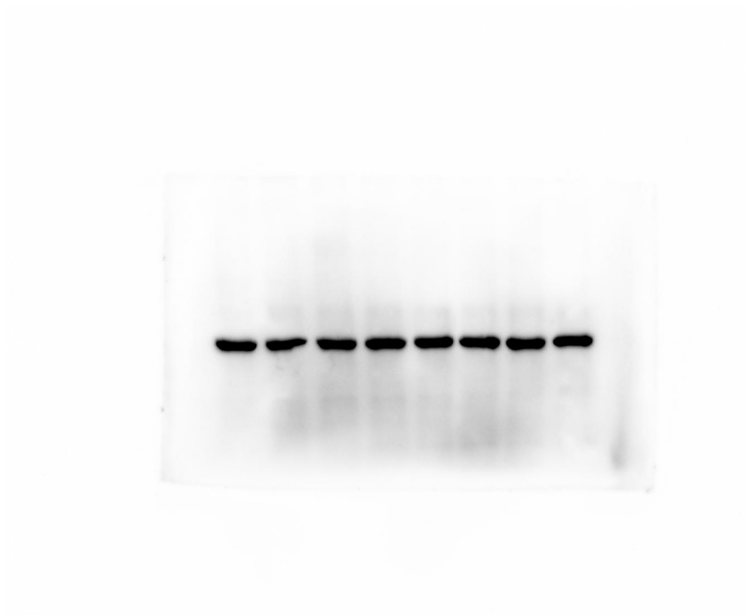

*$\beta$ -actin*
